# Supplementary material for: Ab initio electronic structure analysis of ground and excited states of HfN0,+
Source: Royal Society of Chemistry journal article supplement (doi:10.1039/d4cp01847h), 2024-01-01
Supplement: d4cp01847h1.pdf [file d4cp01847h1.pdf]

Electronic Supplementary Information

*Ab Initio* Electronic Structure Analysis of Ground and Excited States of HfN<sup>0,+</sup>

Isuru R. Ariyaratna

*Physics and Chemistry of Materials (T-1), Los Alamos National Laboratory, Los Alamos, NM 87545,  
USA*

Email: isuru@lanl.gov

**Contents**

|                                                                                                                                                               |         |
|---------------------------------------------------------------------------------------------------------------------------------------------------------------|---------|
| <b>Table S1</b> CASSCF molecular orbital compositions of HfN                                                                                                  | Page S2 |
| <b>Table S2</b> $r_e$ , $T_e$ , $\omega_e$ , and $\omega_e x_e$ values of low-lying spin-orbit state of HfN                                                   | Page S2 |
| <b>Table S3</b> $D_e$ , $r_e$ , $\omega_e$ , and $\omega_e x_e$ values of the HfN( $X^2\Sigma^+$ ) and HfN <sup>+</sup> ( $X^1\Sigma^+$ ) at the TZ-C-CCSD(T) | Page S2 |
| <b>Table S4</b> $r_e$ , $T_e$ , $\omega_e$ , and $\omega_e x_e$ values of low-lying spin-orbit state of HfN <sup>+</sup>                                      | Page S3 |
| <b>Figure S1</b> MRCI DMCs of the lowest five electronic states of HfN <sup>+</sup>                                                                           | Page S3 |

**Table S1.** The dominant molecular orbital compositions of HfN obtained at the state average CASSCF level.

| Molecular orbital <sup>a</sup>                    | Composition                                                                        |
|---------------------------------------------------|------------------------------------------------------------------------------------|
| 1 $\sigma$                                        | 87.4% 2s (N)                                                                       |
| 2 $\sigma$                                        | 63.8% 2p <sub>z</sub> (N) + 18.2% 5d <sub>z<sup>2</sup></sub> (Hf) + 17.3% 6s (Hf) |
| 3 $\sigma$                                        | 72.4% 6s (Hf) + 15.2% 5d <sub>z<sup>2</sup></sub> (Hf)                             |
| 1 $\pi$ <sub>y</sub>                              | 57.4% 2p <sub>y</sub> (N) + 19.0% 5d <sub>yz</sub> (Hf)                            |
| 2 $\pi$ <sub>y</sub>                              | 18.0% 6p <sub>y</sub> Hf + 47.3% 5d <sub>yz</sub> Hf + 9.7% 2p <sub>y</sub> (N)    |
| 1 $\delta$ <sub>x<sup>2</sup>-y<sup>2</sup></sub> | 100% 5d <sub>x<sup>2</sup>-y<sup>2</sup></sub> (Hf)                                |

<sup>a</sup> Contours of molecular orbitals are given in Figure 2 of the paper.

**Table S2.** Bond length ( $r_e$ , Å), excitation energy ( $T_e$ , cm<sup>-1</sup>), harmonic vibrational frequency ( $\omega_e$ , cm<sup>-1</sup>), and anharmonicity ( $\omega_e x_e$ , cm<sup>-1</sup>) of the low-lying  $\Omega = 1/2, 1/2, 3/2, 1/2, 3/2,$  and  $5/2$  spin-orbit states of HfN at MRCI [cc-pVQZ-PP (60ECP) of Hf and aug-cc-pVQZ of N].

| $\Omega$ | $r_e$ | $T_e$ | $\omega_e$ | $\omega_e x_e$ | Composition                                                                                        |
|----------|-------|-------|------------|----------------|----------------------------------------------------------------------------------------------------|
| 1/2      | 1.736 | 0     | 916        | 4.9            | 99.652% X <sup>2</sup> $\Sigma^+$ , 0.346% 1 <sup>2</sup> $\Pi$                                    |
| 1/2      | 1.781 | 6264  | 862        | 18.4           | 94.913% 2 <sup>2</sup> $\Sigma^+$ , 5.026% 1 <sup>2</sup> $\Pi$ , 0.061% X <sup>2</sup> $\Sigma^+$ |
| 3/2      | 1.866 | 7216  | 939        | 12.6           | 100% 1 <sup>2</sup> $\Pi$                                                                          |
| 1/2      | 1.847 | 8015  | 1095       | 7.9            | 79.096% 1 <sup>2</sup> $\Pi$ , 20.006% 2 <sup>2</sup> $\Sigma^+$ ,                                 |
| 3/2      | 1.825 | 13498 | 795        | 1.9            | 100% 1 <sup>2</sup> $\Delta$                                                                       |
| 5/2      | 1.825 | 15796 | 797        | 2.0            | 100% 1 <sup>2</sup> $\Delta$                                                                       |

**Table S3.** Dissociation energy with respect to ground state fragments ( $D_e$ , kcal/mol), bond length ( $r_e$ , Å), harmonic vibrational frequency ( $\omega_e$ , cm<sup>-1</sup>), and anharmonicity ( $\omega_e x_e$ , cm<sup>-1</sup>) of HfN(X<sup>2</sup> $\Sigma^+$ ) and HfN<sup>+</sup>(X<sup>1</sup> $\Sigma^+$ ) at the CCSD(T) with cc-pwCVTZ-PP (60ECP) of Hf and aug-cc-pVTZ of N basis set [TZ-C-CCSD(T)]. The 5s<sup>2</sup>5p<sup>6</sup> core electrons of Hf are correlated.

| Species                                       | $D_e$  | $r_e$ | $\omega_e$ | $\omega_e x_e$ |
|-----------------------------------------------|--------|-------|------------|----------------|
| HfN(X <sup>2</sup> $\Sigma^+$ )               | 128.55 | 1.724 | 939        | 3.8            |
| HfN <sup>+</sup> (X <sup>1</sup> $\Sigma^+$ ) | 111.28 | 1.679 | 990        | 6.7            |

**Table S4.** Bond length ( $r_e$ , Å), excitation energy ( $T_e$ ,  $\text{cm}^{-1}$ ), harmonic vibrational frequency ( $\omega_e$ ,  $\text{cm}^{-1}$ ), and anharmonicity ( $\omega_e x_e$ ,  $\text{cm}^{-1}$ ) of the low-lying  $\Omega$  spin-orbit states of  $\text{HfN}^+$  at MRCI [cc-pVQZ-PP (60ECP) of Hf and aug-cc-pVQZ of N].

| $\Omega$       | $r_e$ | $T_e$ | $\omega_e$ | $\omega_e x_e$ | Composition                                                 |
|----------------|-------|-------|------------|----------------|-------------------------------------------------------------|
| 0 <sup>+</sup> | 1.698 | 0     | 955        | 6.5            | 99.65% $X^1\Sigma^+$ , 0.34 % $1^3\Pi$                      |
| 0 <sup>-</sup> | 1.766 | 7939  | 920        | 7.0            | 97.71% $1^3\Sigma^+$ , 2.30% $1^3\Pi$                       |
| 1              | 1.765 | 7950  | 922        | 6.8            | 98.19% $1^3\Sigma^+$ , 1.14% $1^3\Pi$ , 0.68% $1^1\Pi$      |
| 0 <sup>+</sup> | 1.774 | 8517  | 928        | 11.7           | 96.70% $2^1\Sigma^+$ , 3.26 $1^3\Pi$                        |
| 2              | 1.843 | 10605 | 839        | 5.0            | 100% $1^3\Pi$                                               |
| 1              | 1.845 | 10749 | 866        | 4.1            | 89.75% $1^3\Pi$ , 2.39% $1^3\Sigma^+$ , 7.86 $1^1\Pi$       |
| 0 <sup>-</sup> | 1.843 | 11094 | 904        | 1.1            | 92.32% $1^3\Pi$ , 7.67% $1^3\Sigma^+$                       |
| 0 <sup>+</sup> | 1.842 | 11215 | 911        | 4.4            | 89.76% $1^3\Pi$ , 1.50% $X^1\Sigma^+$ , 8.75% $2^1\Sigma^+$ |
| 1              | 1.850 | 12171 | 890        | 1.2            | 90.45% $1^1\Pi$ , 6.37% $1^3\Pi$ , 3.18% $1^3\Sigma^+$      |

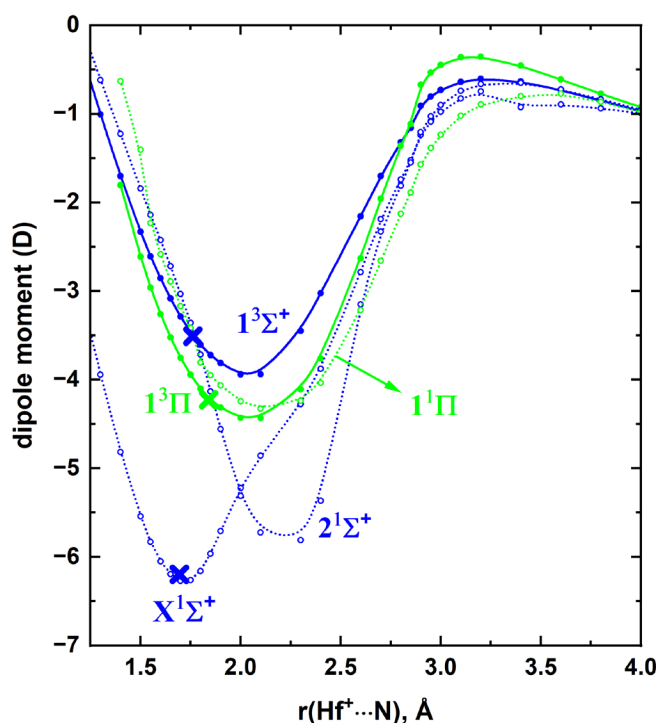

**Figure S1.** MRCI DMCs of the lowest five electronic states of  $\text{HfN}^+$  as a function of  $\text{Hf}^+\cdots\text{N}$  distance [ $r(\text{Hf}^+\cdots\text{N})$ , Å]. The CCSD(T)  $\mu$  values of  $X^1\Sigma^+$ ,  $1^3\Pi$ , and  $1^3\Sigma^+$  states calculated at the equilibrium bond distances are depicted in blue (at -6.20 D), green (at -4.23 D), and blue (at -3.51 D) cross marks, respectively.
